# Supplementary material for: Distinct variation in taste quality of Congou black tea during a single spring season
Source: PubMed Central journal article supplement (PMC7174197; doi:10.1002/fsn3.1467), 2020-02-18
Supplement: FSN3-8-1848-s001.pdf [file FSN3-8-1848-s001.pdf]

## Supporting Information

**Figure S1** Relative standard deviation of the sensors from Congou black tea infusions.

SRS, SWS, BRS, STS, UMS, GPS, and SPS, representing sour, sweet, bitter, salty, umami, and two combination tastes, respectively.

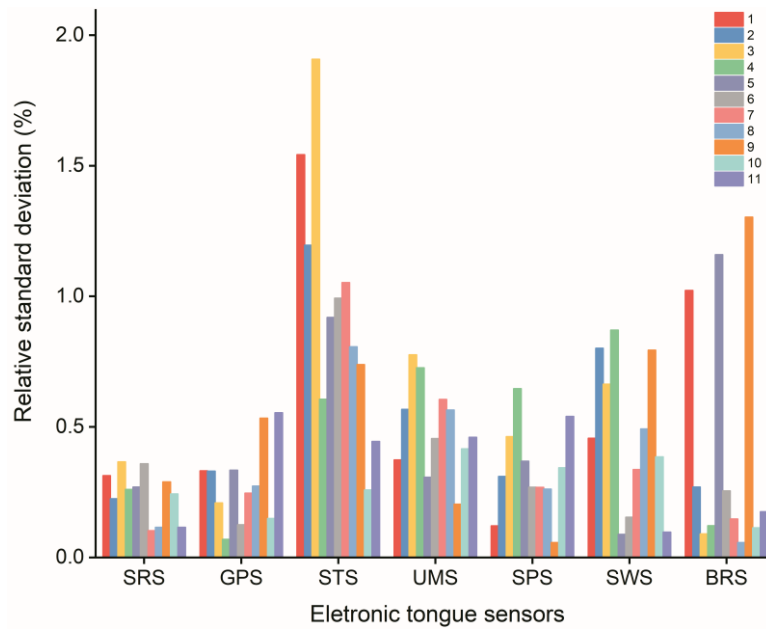

**Table S1** Eigenvalues and variance of principal components

| Principal components number | Eigenvalue | Percentage of Variance (%) | Cumulative (%) |
|-----------------------------|------------|----------------------------|----------------|
| 1                           | 18.23      | 77.86                      | 77.86          |
| 2                           | 4.33       | 18.48                      | 96.34          |
| 3                           | 0.64       | 2.73                       | 99.07          |
| 4                           | 0.13       | 0.57                       | 99.64          |
| 5                           | 0.07       | 0.29                       | 99.93          |
| 6                           | 0.02       | 0.05                       | 99.98          |
| 7                           | 0.01       | 0.02                       | 100            |

**Table S2** Amino acid monomer mean contents (%) of black tea samples (BTS)

| BTS | Asp   | Ser   | Glu   | Gly   | His   | Arg   | Thr   | Ala   | Pro   | Cys   | Tyr   | Val   | Met   | Lys   | Ile   | Ike   | Phe   | Theanine |
|-----|-------|-------|-------|-------|-------|-------|-------|-------|-------|-------|-------|-------|-------|-------|-------|-------|-------|----------|
| 1   | 0.119 | 0.143 | 0.280 | 0.003 | 0.152 | 0.196 | 0.038 | 0.036 | 0.160 | 0.000 | 0.024 | 0.017 | 0.002 | 0.036 | 0.024 | 0.045 | 0.042 | 1.527    |
| 2   | 0.090 | 0.273 | 0.282 | 0.006 | 0.081 | 0.118 | 0.050 | 0.043 | 0.136 | 0.003 | 0.038 | 0.050 | 0.004 | 0.068 | 0.055 | 0.082 | 0.107 | 0.965    |
| 3   | 0.120 | 0.241 | 0.272 | 0.005 | 0.102 | 0.126 | 0.052 | 0.042 | 0.124 | 0.001 | 0.045 | 0.044 | 0.003 | 0.059 | 0.048 | 0.068 | 0.096 | 0.988    |
| 4   | 0.110 | 0.139 | 0.434 | 0.004 | 0.157 | 0.243 | 0.042 | 0.041 | 0.122 | 0.001 | 0.034 | 0.023 | 0.004 | 0.035 | 0.034 | 0.062 | 0.056 | 1.262    |
| 5   | 0.106 | 0.172 | 0.167 | 0.004 | 0.086 | 0.129 | 0.049 | 0.049 | 0.146 | 0.001 | 0.061 | 0.034 | 0.004 | 0.059 | 0.044 | 0.071 | 0.097 | 0.998    |
| 6   | 0.128 | 0.128 | 0.185 | 0.003 | 0.077 | 0.060 | 0.039 | 0.030 | 0.109 | 0.001 | 0.049 | 0.039 | 0.003 | 0.049 | 0.038 | 0.060 | 0.101 | 0.997    |
| 7   | 0.122 | 0.148 | 0.178 | 0.007 | 0.108 | 0.063 | 0.043 | 0.031 | 0.103 | 0.001 | 0.042 | 0.026 | 0.005 | 0.046 | 0.033 | 0.055 | 0.097 | 1.040    |
| 8   | 0.120 | 0.162 | 0.184 | 0.002 | 0.065 | 0.049 | 0.043 | 0.037 | 0.106 | 0.003 | 0.036 | 0.038 | 0.005 | 0.048 | 0.042 | 0.055 | 0.111 | 0.790    |
| 9   | 0.172 | 0.157 | 0.184 | 0.005 | 0.047 | 0.032 | 0.050 | 0.043 | 0.120 | 0.002 | 0.058 | 0.042 | 0.005 | 0.054 | 0.044 | 0.062 | 0.110 | 0.643    |
| 10  | 0.090 | 0.200 | 0.151 | 0.006 | 0.049 | 0.059 | 0.036 | 0.032 | 0.099 | 0.004 | 0.039 | 0.046 | 0.003 | 0.049 | 0.041 | 0.053 | 0.116 | 0.795    |
| 11  | 0.096 | 0.222 | 0.120 | 0.003 | 0.046 | 0.043 | 0.023 | 0.031 | 0.068 | 0.001 | 0.036 | 0.046 | 0.002 | 0.035 | 0.032 | 0.039 | 0.105 | 0.486    |
| SD  | 0.023 | 0.047 | 0.089 | 0.001 | 0.039 | 0.068 | 0.008 | 0.006 | 0.025 | 0.001 | 0.011 | 0.011 | 0.001 | 0.011 | 0.009 | 0.012 | 0.023 | 0.283    |
| CV% | 19.74 | 26.12 | 40.08 | 32.18 | 44.15 | 67.11 | 19.67 | 16.61 | 21.15 | 72.48 | 25.72 | 28.58 | 32.77 | 22.40 | 21.49 | 20.28 | 24.80 | 29.70    |
